# Supplementary material for: The Role of AlphαSynuclein in Mouse Models of Acute, Inflammatory and Neuropathic Pain
Source: MDPI journal article supplement (doi:10.3390/cells11121967), 2022-06-19
Supplement: s1 [file s1]

Suppl Figure S1: Expression, regulation and functions of  $\alpha$ Syn in the DRGs

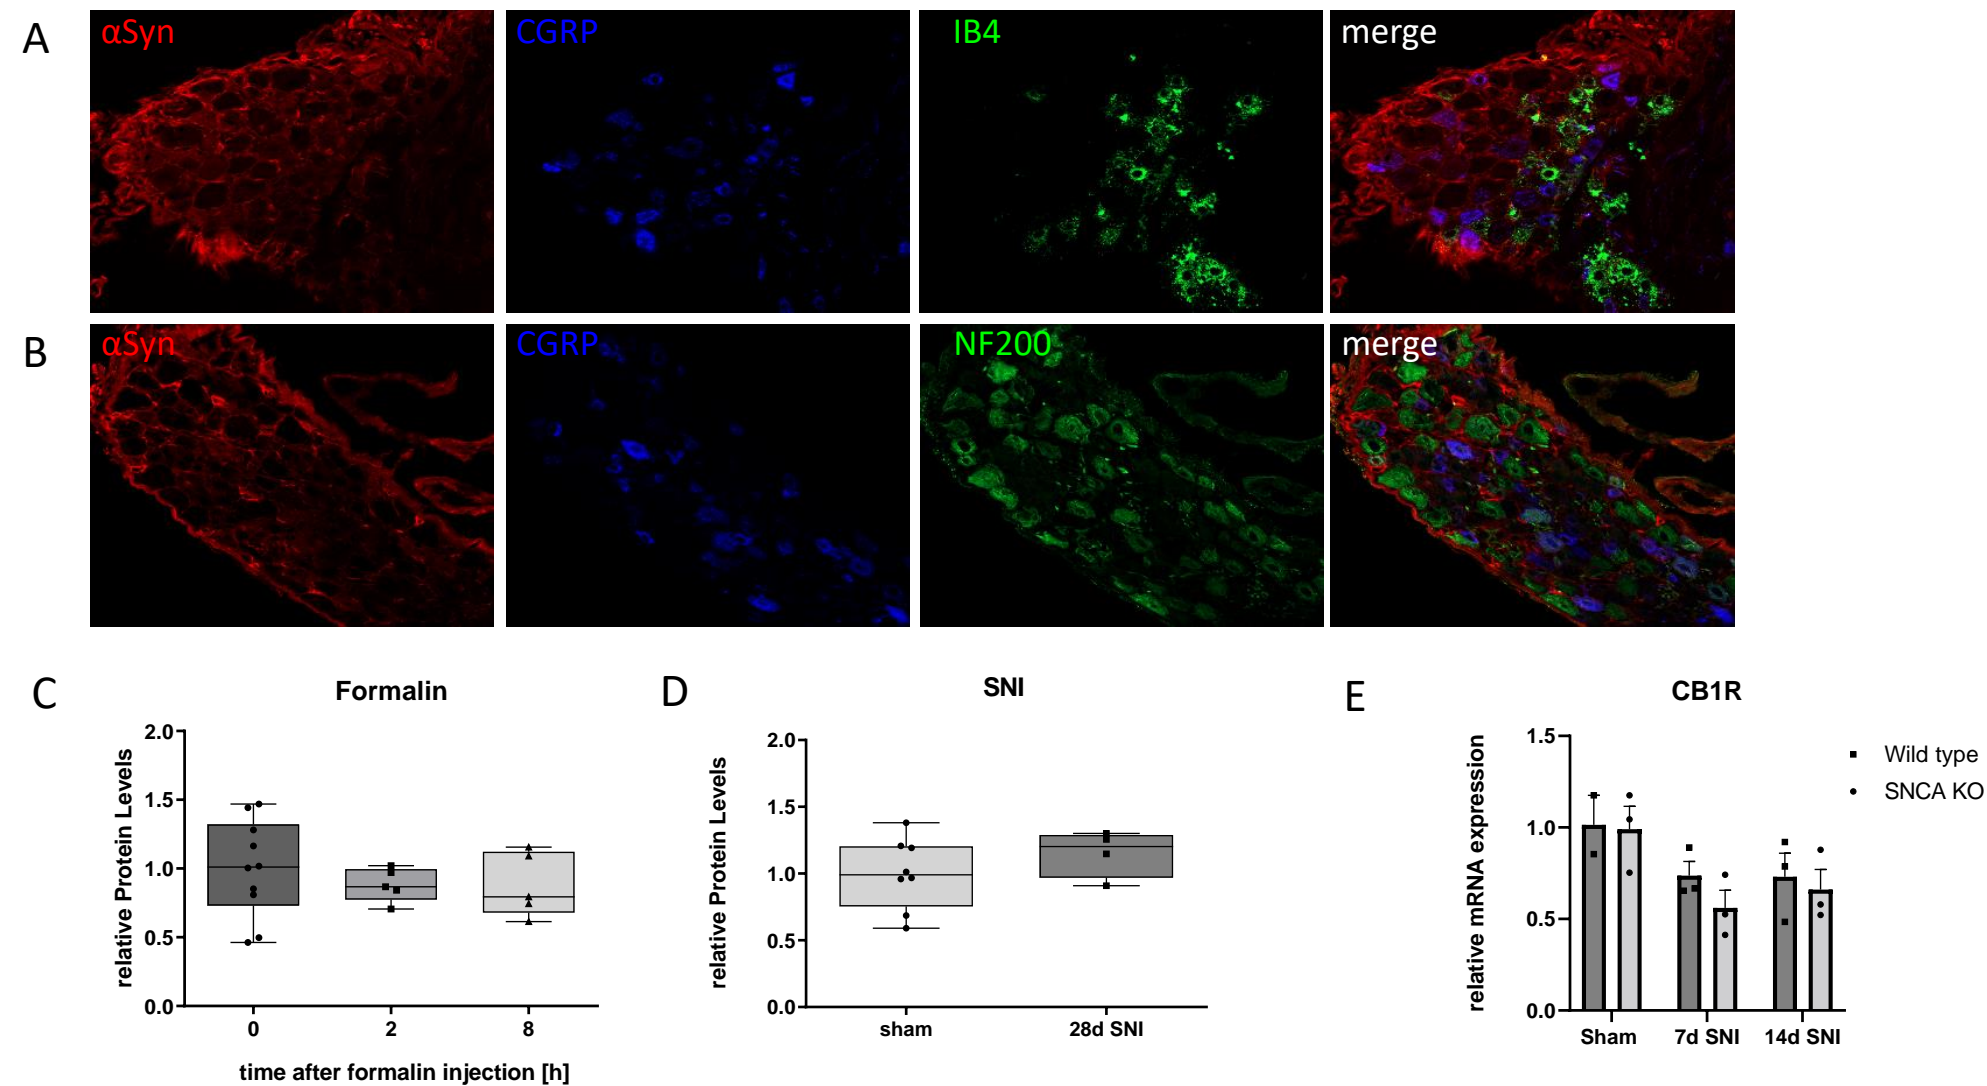

Suppl. Figure S1: Expression, regulation and functions of  $\alpha$ Syn in the DRGs. (A) immunofluorescence showing  $\alpha$ Syn (red), CGRP (blue), IB4 (green) and merge, (B) immunofluorescence showing  $\alpha$ Syn (red), CGRP (blue), NF200 (green) and merge in the DRG of wild type mice, (C) Protein regulation of  $\alpha$ Syn in the DRG after formalin injection into the paw (n = 4-10), (D) Protein regulation of  $\alpha$ Syn in the DRG in sham and SNI-treated mice (n = 4-8), (E) Regulation of CB1R mRNA in the DRG of Wild type and Snca knock-out mice after sham and SNI treatment (n=3).

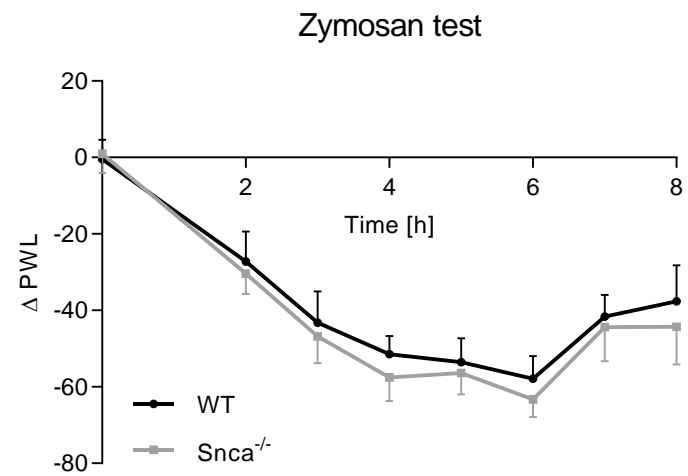

**Suppl. Figure S2: Zymosan-induced paw inflammation.** Dynamic plantar test to assess mechanical allodynia in the paw after injection of zymosan A in wild type and Snca knock-out mice. The diagram shows the delta paw withdrawal latency ( $\Delta$  PWL) which was calculated as the percentage ratio between the ipsi- and contralateral paw. n = 7-8.

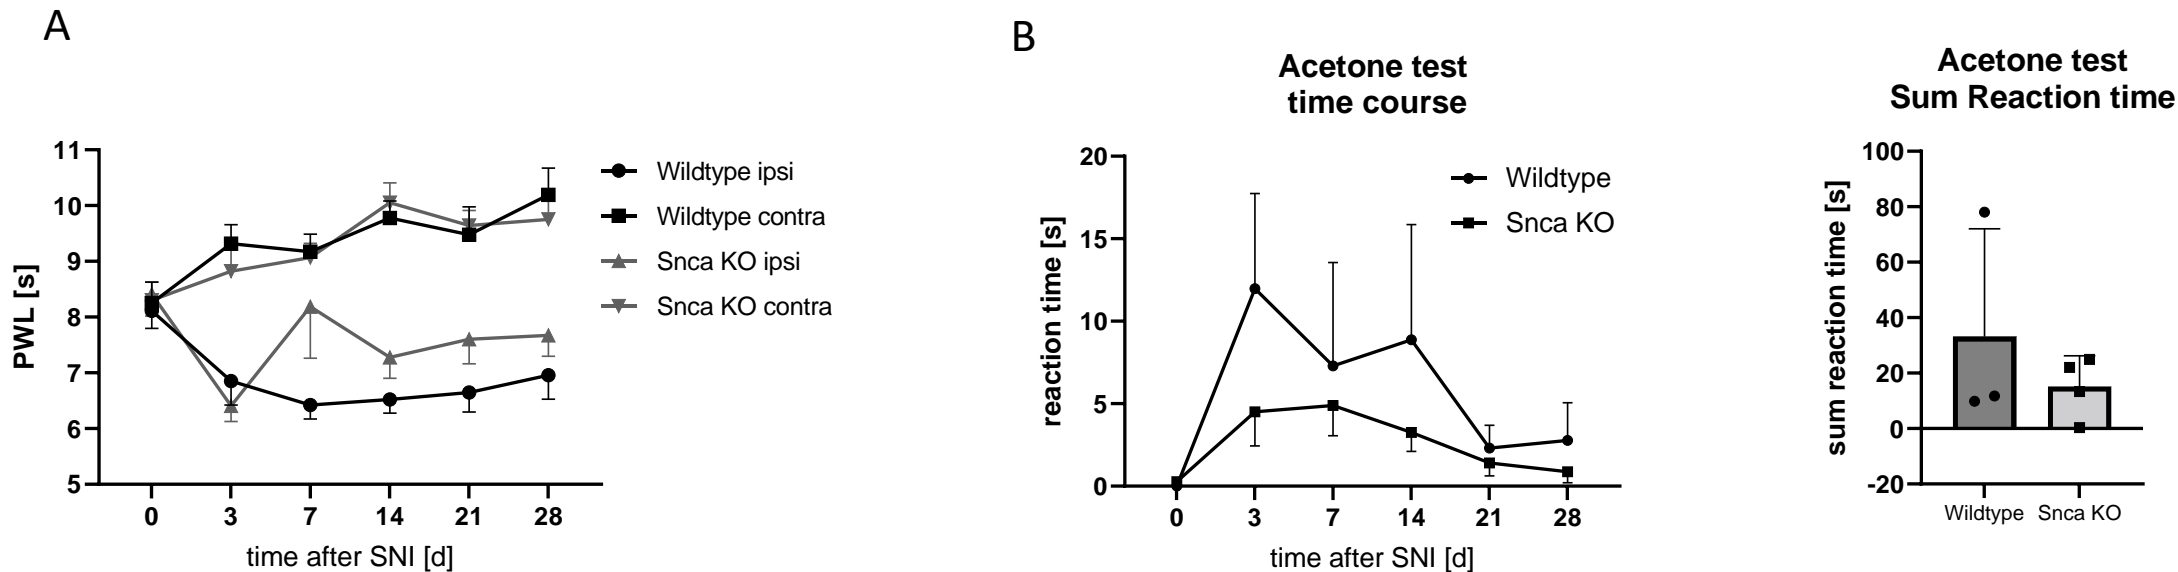

**Suppl. Figure S3: Mechanical and cold allodynia in the SNI model,** (A) Paw withdrawal latencies of ipsi- and contralateral paws in the SNI. Dynamic plantar test to assess mechanical allodynia in wild type and Snca knock-out mice after SNI. n = 12 WT/13KO. (B) Cold allodynia as assessed in the acetone test after SNI surgery. The left diagram shows the time course after SNI, the right diagram the total reaction time per group (n =3).

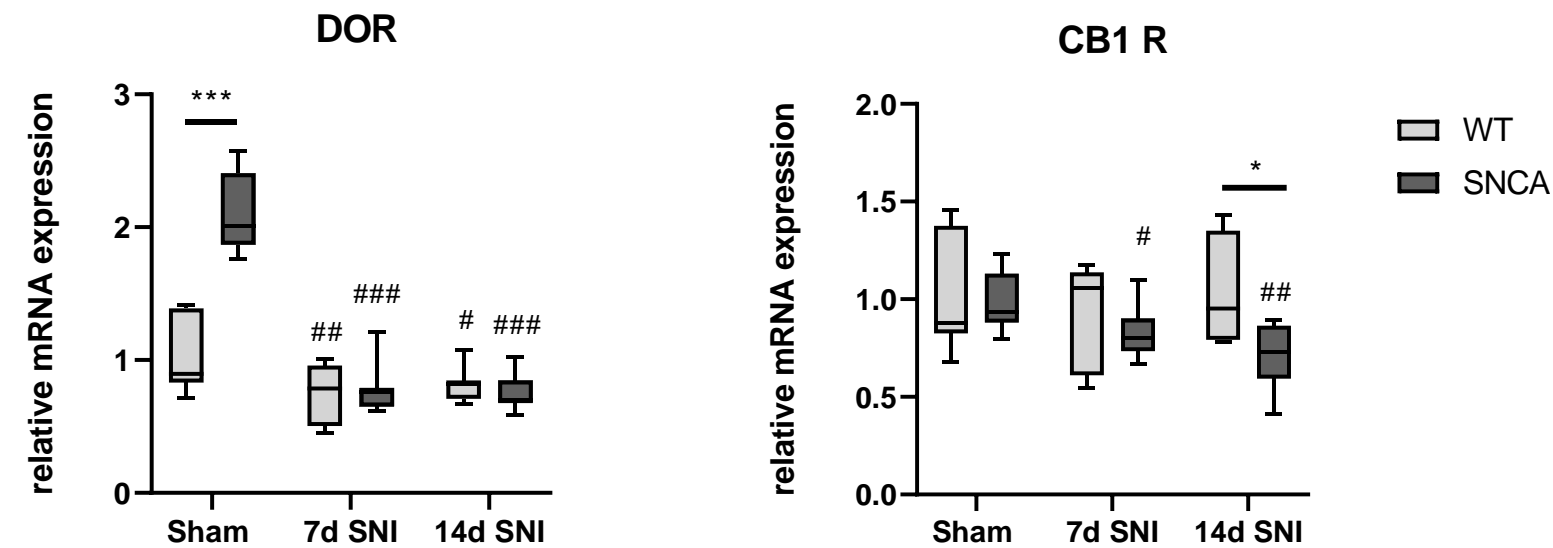

**Suppl. Figure S4: Expression of delta-opioid receptor (DOR) and cannabinoid receptor 1 (CB1 R) genes in the spinal cord of mice in the SNI model.** Relative mRNA expression of DOR and CB1 R in the spinal cord of wild type and SNCA knock-out mice after sham or 7 and 14d after SNI surgery, respectively. For better comparison, the wild type sham control has been set as 1. \* $p < 0.05$ , \*\*\*  $p < 0.001$  statistically significant difference between the genotypes, # $p < 0.05$ , ## $p < 0.01$ , ### $p < 0.001$  statistically significant difference between Sham and SNI.

Suppl Figure S5: Immunofluorescence background

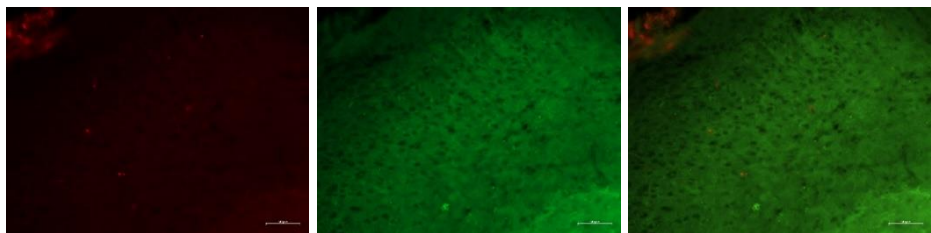

**Suppl. Figure S5: Immunofluorescence background control staining**, immunofluorescence was performed with the same conditions as described but without primary antibodies. Left: Cy-3 background, middle: AlexaFluor-488 staining, right: merge, Scale bars = 50  $\mu\text{m}$
